# Supplementary material for: Presence of periodontal pathogenic bacteria in blood of patients with coronary artery disease
Source: PubMed Central journal article supplement (PMC8786953; doi:10.1038/s41598-022-05337-1), 2022-01-24
Supplement: 41598_2022_5337_MOESM1_ESM.pdf [file 41598_2022_5337_MOESM1_ESM.pdf]

## Supplementary Tables

### Presence of periodontal pathogenic bacteria in blood of patients with coronary artery disease

Zuray Corredor<sup>1</sup>, Andrés Suarez-Molina<sup>2</sup>, Cristian Fong<sup>3</sup>, Laura Cifuentes-C<sup>1</sup>, Sandra Guauque-Olarte<sup>4</sup>

<sup>1</sup> Faculty of Dentistry, Universidad Cooperativa de Colombia campus Pasto, Colombia

<sup>2</sup> Instituto Departamental de Salud de Nariño, Colombia

<sup>3</sup> Faculty of Medicine, Universidad Cooperativa de Colombia campus Santa Marta, Colombia

<sup>4</sup> Faculty of Dentistry, Universidad Cooperativa de Colombia campus Envigado, Colombia

**Table S1.** Age and coronary artery calcium (CAC) score of the CAD and healthy individuals. The CAC was measured by multislice computer tomography.

| CAD group        |                   |                      | Healthy group    |                   |          |
|------------------|-------------------|----------------------|------------------|-------------------|----------|
| ID               | Age               | CAC                  | ID               | Age               | CAC      |
| SRR1313301       | 55                | 3532                 | SRR1313293       | 55                | 0        |
| SRR1313302       | 64                | 2885                 | SRR1313294       | 63                | 0        |
| SRR1313303       | 57                | 1693                 | SRR1313295       | 56                | 0        |
| SRR1313297       | 61                | 1370                 | SRR1313289       | 60                | 0        |
| SRR1313296       | 54                | 1114                 | SRR1313288       | 54                | 0        |
| SRR1313298       | 51                | 1012                 | SRR1313290       | 52                | 0        |
| SRR1313300       | 53                | 4352                 | SRR1313292       | 52                | 0        |
| SRR1313299       | 50                | 514                  | SRR1313291       | 51                | 0        |
| <b>Mean ± SD</b> | <b>55.6 ± 4.8</b> | <b>2059 ± 1367.7</b> | <b>Mean ± SD</b> | <b>55.4 ± 4.2</b> | <b>0</b> |

CAC: coronary artery calcification; CAD: Coronary artery disease.

**Table S2.** Number of total and classified reads in CAD patients and healthy individuals.

| <b>Sample ID<br/>CAD</b> | <b>#<br/>classified<br/>reads</b> | <b>#<br/>bacterial<br/>reads</b> | <b>%<br/>bacterial<br/>reads</b> | <b>Sample ID<br/>Healthy</b> | <b>#<br/>classified<br/>reads</b> | <b>#<br/>bacterial<br/>reads</b> | <b>%<br/>bacterial<br/>reads</b> |
|--------------------------|-----------------------------------|----------------------------------|----------------------------------|------------------------------|-----------------------------------|----------------------------------|----------------------------------|
| SRR1313296               | 172155                            | 137980                           | 80,1                             | SRR1313288                   | 72970                             | 54334                            | 74,5                             |
| SRR1313297               | 94440                             | 78030                            | 82,6                             | SRR1313289                   | 389575                            | 379675                           | 97,5                             |
| SRR1313298               | 106623                            | 89464                            | 83,9                             | SRR1313290                   | 104517                            | 81106                            | 77,6                             |
| SRR1313299               | 99950                             | 74850                            | 74,9                             | SRR1313291                   | 73029                             | 49072                            | 67,2                             |
| SRR1313300               | 89035                             | 74527                            | 83,7                             | SRR1313292                   | 126326                            | 113514                           | 89,9                             |
| SRR1313301               | 97490                             | 86976                            | 89,2                             | SRR1313293                   | 208471                            | 194114                           | 93,1                             |
| SRR1313302               | 79088                             | 66514                            | 84,1                             | SRR1313294                   | 135602                            | 103813                           | 76,6                             |
| SRR1313303               | 81367                             | 64675                            | 79,5                             | SRR1313295                   | 161246                            | 143459                           | 89,0                             |
| <b>Mean</b>              | 102519                            | 84127                            | 82,1                             | <b>Mean</b>                  | 158967                            | 139886                           | 88,0                             |
| <b>Median</b>            | 95965                             | 76440                            | 79,7                             | <b>Median</b>                | 130964                            | 108664                           | 83,0                             |
| <b>Std dev</b>           | 29620                             | 23424                            | -                                | <b>Std dev</b>               | 103505                            | 107882                           | -                                |

**Table S3.** Complete list of species unique to the CAD group and the healthy group with their frequencies.

| Species unique to CAD group                    | Counts | Species unique to healthy group              | Counts |
|------------------------------------------------|--------|----------------------------------------------|--------|
| <i>Anabaena variabilis</i>                     | 4      | <i>Candidatus Sulfuricurvum sp. RIFRC-1</i>  | 3      |
| <i>Prosthecochloris aestuarii</i>              | 4      | <i>Geobacillus thermoleovorans</i>           | 3      |
| <i>Thermodesulfatator indicus</i>              | 4      | <i>Haloferax mediterranei</i>                | 3      |
| <i>Exiguobacterium sibiricum</i>               | 3      | <i>Shewanella sp. MR-4</i>                   | 3      |
| <i>Fervidobacterium nodosum</i>                | 3      | <i>Thermoanaerobacter italicus</i>           | 3      |
| <i>Pelodictyon phaeoclathratiforme</i>         | 3      | <i>Candidatus Nitrosopumilus sp. AR2</i>     | 2      |
| <i>Borrelia hermsii</i>                        | 2      | <i>Chlamydia trachomatis</i>                 | 2      |
| <i>Brucella ceti</i>                           | 2      | <i>Geobacillus kaustophilus</i>              | 2      |
| <i>Clostridium sp. BNL1100</i>                 | 2      | <i>Phaeobacter inhibens</i>                  | 2      |
| <i>Mycobacterium sp. MOTT36Y</i>               | 2      | <i>Shewanella halifaxensis</i>               | 2      |
| <i>Natronomonas moolapensis</i>                | 2      | <i>Thermosipho africanus</i>                 | 2      |
| <i>Rickettsia montanensis</i>                  | 2      | <i>Acidilobus saccharovorans</i>             | 1      |
| <i>Shewanella putrefaciens</i>                 | 2      | <i>Bartonella tribocorum</i>                 | 1      |
| <i>Sulfolobus tokodaii</i>                     | 2      | <i>Borrelia miyamotoi</i>                    | 1      |
| <i>Thermosynechococcus elongatus</i>           | 2      | <i>Campylobacter coli</i>                    | 1      |
| <i>Vibrio alginolyticus</i>                    | 2      | <i>Candidatus Blochmannia pennsylvanicus</i> | 1      |
| <i>Wolbachia endosymbiont of Brugia malayi</i> | 2      | <i>Candidatus Methanomethylophilus alvus</i> | 1      |
| <i>Borrelia valaisiana</i>                     | 1      | <i>Candidatus Nitrosopumilus koreensis</i>   | 1      |
| <i>Candidatus Blochmannia chromaiodes</i>      | 1      | <i>Candidatus Ruthia magnifica</i>           | 1      |
| <i>Cenarchaeum symbiosum</i>                   | 1      | <i>Chlamydia muridarum</i>                   | 1      |
| <i>Chlamydophila abortus</i>                   | 1      | <i>Chlamydia pneumoniae</i>                  | 1      |
| <i>Chlamydophila felis</i>                     | 1      | <i>Dictyoglomus thermophilum</i>             | 1      |
| <i>Haloarcula marismortui</i>                  | 1      | <i>Geobacillus sp. Y4.IMC1</i>               | 1      |
| <i>Halobacterium salinarum</i>                 | 1      | <i>Haloarcula hispanica</i>                  | 1      |
| <i>Halorhabdus utahensis</i>                   | 1      | <i>Leuconostoc kimchii</i>                   | 1      |
| <i>Helicobacter acinonychis</i>                | 1      | <i>Leuconostoc sp. C2</i>                    | 1      |
| <i>Helicobacter hepaticus</i>                  | 1      | <i>Listeria seeligeri</i>                    | 1      |
| <i>Kinetoplastibacterium blastocrithidii</i>   | 1      | <i>Methanoregula formicica</i>               | 1      |
| <i>Lactobacillus amylovorus</i>                | 1      | <i>Methanosaeta thermophila</i>              | 1      |
| <i>Listeria welshimeri</i>                     | 1      | <i>Methanosphaera stadtmanae</i>             | 1      |
| <i>Methanocaldococcus jannaschii</i>           | 1      | <i>Methanothermobacter marburgensis</i>      | 1      |
| <i>Methanocella arvoryzae</i>                  | 1      | <i>Methanotorris igneus</i>                  | 1      |
| <i>Methanothermobacter thermautotrophicus</i>  | 1      | <i>Mycoplasma pneumoniae</i>                 | 1      |
| <i>Mycoplasma synoviae</i>                     | 1      | <i>Pyrococcus furiosus</i>                   | 1      |
| <i>Natrinema sp. J7-2</i>                      | 1      | <i>Rickettsia conorii</i>                    | 1      |
| <i>Natronomonas pharaonis</i>                  | 1      | <i>Rickettsia japonica</i>                   | 1      |
| <i>Pseudothermotoga thermarum</i>              | 1      | <i>Streptococcus phage YMC-2011</i>          | 1      |

|                                                          |   |                                   |   |
|----------------------------------------------------------|---|-----------------------------------|---|
| <i>Pyrobaculum calidifontis</i>                          | 1 | <i>Thermococcus gammatolerans</i> | 1 |
| <i>Pyrobaculum oguniense</i>                             | 1 | <i>Thermotoga neapolitana</i>     | 1 |
| <i>Rickettsia felis</i>                                  | 1 | <i>Vibrio sp. Ex25</i>            | 1 |
| <i>Rickettsia massiliae</i>                              | 1 | <i>Xanthomonas axonopodis</i>     | 1 |
| <i>Rickettsia typhi</i>                                  | 1 |                                   |   |
| <i>Sulfuricurvum kujiense</i>                            | 1 |                                   |   |
| <i>Thermoanaerobacter pseudethanolicus</i>               | 1 |                                   |   |
| <i>Thermococcus barophilus</i>                           | 1 |                                   |   |
| <i>Thermogladius cellulolyticus</i>                      | 1 |                                   |   |
| <i>Thermoplasmatales archaeon BRNA1</i>                  | 1 |                                   |   |
| <i>Thermosynechococcus sp. NK55a</i>                     | 1 |                                   |   |
| <i>Ureaplasma parvum</i>                                 | 1 |                                   |   |
| <i>Vulcanisaeta distributa</i>                           | 1 |                                   |   |
| <i>Wolbachia endosymbiont of Drosophila melanogaster</i> | 1 |                                   |   |
